# Supplementary material
Source: Springer Nature journal article supplement (https://www.springermedizin.de/resource/supplementary/12958_2005_294_MOESM7_ESM.pdf/9567560)

# OVARY

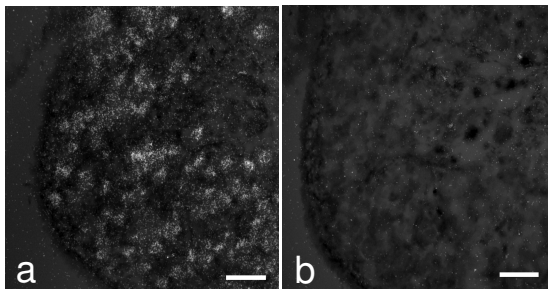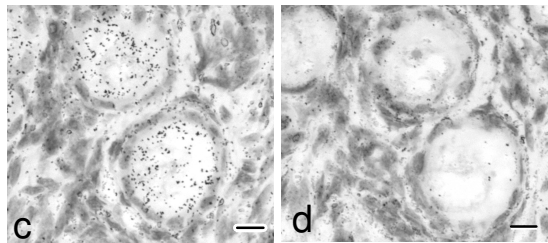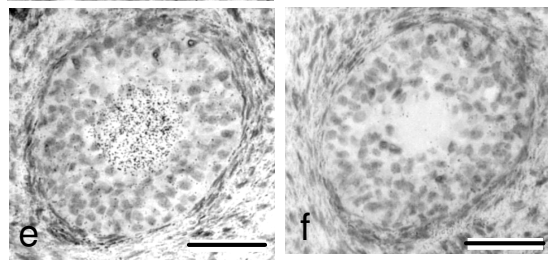

# TESTIS

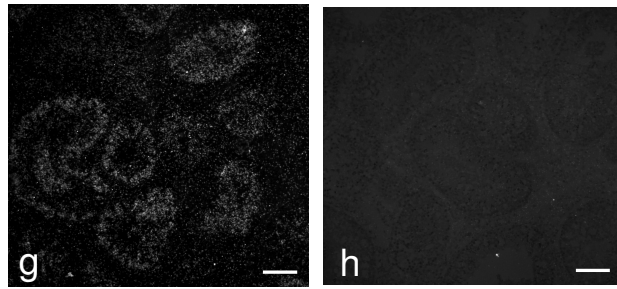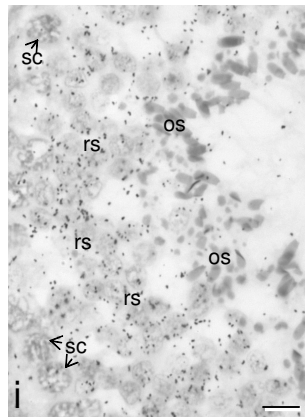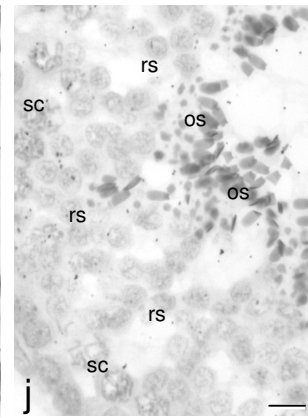

Supplement: MOESM7 [file 9567560]
